# Supplementary material
Source: publisher figshare collection journal article supplement (https://acs.figshare.com/ndownloader/files/10132341)
Supplement: Supplementary file 1 [file 10132341]

## SUPPORTING INFORMATION

### **Development and characterization of a soybean experimental line lacking the $\alpha'$ subunit of $\beta$ -conglycinin and G1, G2, and G4 glycinin**

Bo Song<sup>1,2</sup>, Nathan W. Oehrle<sup>2</sup>, Shanshan Liu<sup>1,\*</sup>, and Hari B. Krishnan<sup>2,3,\*</sup>

<sup>1</sup>Key Laboratory of Soybean Biology at the Chinese Ministry of Education, Northeast Agricultural University, Harbin, China.

<sup>2</sup>Plant Genetics Research Unit, Agricultural Research Service, U.S. Department of Agriculture, University of Missouri, Columbia, MO, USA.

<sup>3</sup>Plant Science Division, University of Missouri, Columbia, MO, USA

\*Corresponding authors E-mail: [Hari.Krishnan@ARS.USDA.GOV](mailto:Hari.Krishnan@ARS.USDA.GOV)

[ars336699@aliyun.com](mailto:ars336699@aliyun.com)

**Figure S1.** Schematic outline of development of soybean experimental line (BSH-3) derived from DN47 x HS99B crosses.

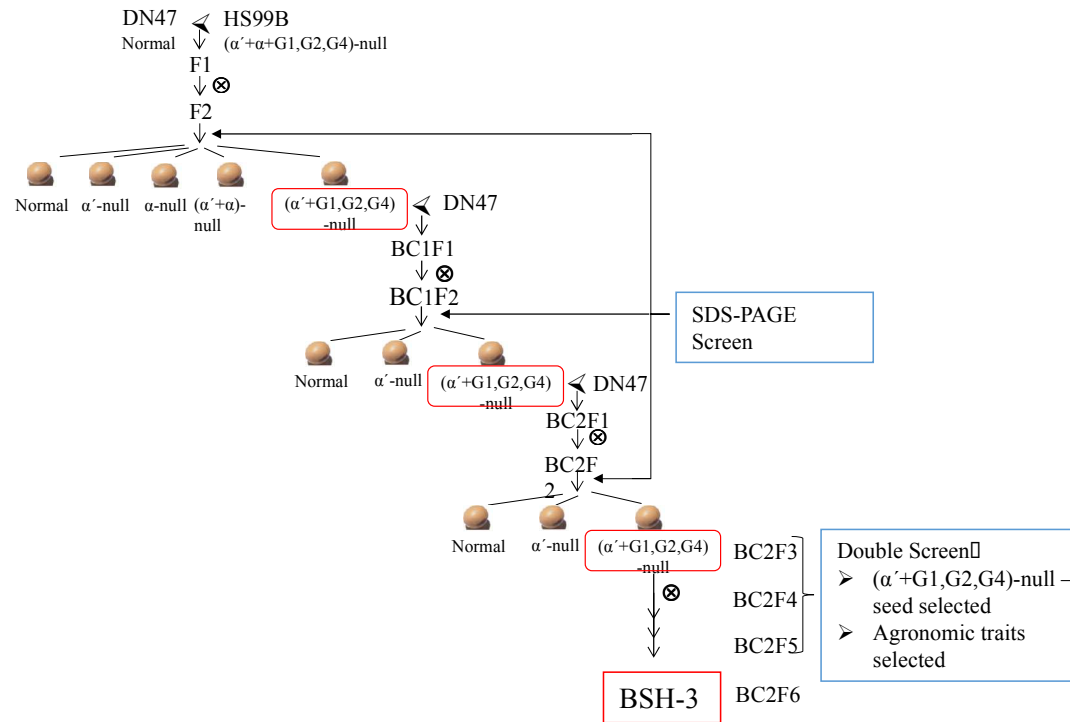

**Table S1.** Protein, oil and fatty acid content of DN47 and BSH-3 seeds.

| Seed Component             | DN47       | BSH-3       | Significance level |
|----------------------------|------------|-------------|--------------------|
| Protein <sup>1</sup>       | 35.6 ± 0.7 | 38.1 ± 0.3  | *                  |
| Oil <sup>1</sup>           | 22.4 ± 0.4 | 19.2 ± 0.06 | *                  |
| Fatty acids <sup>1</sup> : |            |             |                    |
| Palmitic Acid (16:0)       | 12.8 ± 0.1 | 11.9 ± 0.1  | *                  |
| Stearic Acid (18:0)        | 3.5 ± 0.1  | 3.4 ± 0.04  | NS                 |
| Oleic Acid (18:1)          | 28.7 ± 0.6 | 23.8 ± 0.4  | *                  |
| Linoleic Acid (18:2)       | 47.3 ± 0.6 | 52.4 ± 0.4  | *                  |
| Linolenic Acid (18:3)      | 7.5 ± 0.04 | 8.35 ± 0.08 | *                  |

Significantly different means are indicated by \* ( $p \leq 0.05$ ) and insignificant differences are indicated by “NS”.

<sup>1</sup>expressed as percentage
